# Supplementary material
Source: PubMed Central journal article supplement (PMC3664038)
Supplement: supp_ptj.20120072_Borello-France_2012-0072.pdf [file supp_ptj.20120072_Borello-France_2012-0072.pdf]

**eTable 1.**

Exercise and Bladder Control Strategy Adherence and Barrier Questions Asked at Study Visits<sup>a</sup>

| Question                                                                                                                       | Intervention Visit 2 | Intervention Visits 3 and 4 | 3 Months Post-randomization | 6 Months Post-randomization | 12 Months Post-randomization |
|--------------------------------------------------------------------------------------------------------------------------------|----------------------|-----------------------------|-----------------------------|-----------------------------|------------------------------|
| In the past week, approximately how many days did you do your pelvic-floor muscle exercises?                                   | X                    | X                           |                             |                             |                              |
| On a typical day in this past week, how many pelvic muscle contractions did you do?                                            | X                    | X                           |                             |                             |                              |
| During the past month, approximately how many days did you do your pelvic-floor muscle exercises?                              |                      |                             | X                           | X                           | X                            |
| On a typical day in this past month, how many pelvic muscle contractions did you do?                                           |                      |                             | X                           | X                           | X                            |
| Was it hard to find the time to do all of the exercises? (Y/N/U)                                                               | X                    | X                           | X                           |                             |                              |
| Were you unsure if you were doing the exercises correctly? (Y/N/U)                                                             | X                    | X                           | X                           |                             |                              |
| Did the exercises cause any pain? (Y/N/U)                                                                                      | X                    | X                           | X                           |                             |                              |
| Did you have trouble remembering to do the exercises? (Y/N/U)                                                                  | X                    | X                           | X                           |                             |                              |
| Did it seem as if the exercises were not helping your incontinence? (Y/N/U)                                                    | X                    | X                           | X                           |                             |                              |
| Were you so much better that you felt that you did not need to continue the exercises? (Y/N/U)                                 | X                    | X                           |                             |                             |                              |
| Are there any other reasons why you did not do the exercises? (If yes, explain.)                                               | X                    | X                           | X                           |                             |                              |
| Did it seem that using the pessary for incontinence was more important than doing the exercises? (Y/N/U) (combined group only) | X                    | X                           | X                           |                             |                              |
| Did you use the stress strategy? (Y/N)                                                                                         |                      | X                           | X                           |                             |                              |
| How often did this strategy work for you? (All the time/Some of the time/Never)                                                |                      | X                           | X                           |                             |                              |
| Did you find that the leakage started so suddenly that there was not time to use this strategy? (Y/N)                          |                      | X                           | X                           |                             |                              |

<sup>a</sup> Y=yes, N=no, U=uncertain.

## Adherence to Behavioral Interventions for Stress Incontinence

**eTable 2.**

Endorsed Barriers to Exercise Adherence by Treatment Group Assignment

| Barrier to Exercise                                   | Treatment Group Assignment | Visit 2 n (%) | Visit 3 n (%) | Visit 4 n (%) | 3 mo n (%)   |
|-------------------------------------------------------|----------------------------|---------------|---------------|---------------|--------------|
|                                                       | Combined                   | n=139         | n=124         | n=113         | n=128        |
|                                                       | Exercise only              | n=127         | n=114         | n=105         | n=121        |
| Hard to find time to exercise                         | Combined                   | 41 (30)       | 47 (38)       | 36 (32)       | 45 (35)      |
|                                                       | Exercise only              | 28 (22)       | 35 (31)       | 31 (30)       | 51 (42)      |
| Uncertain whether performing exercises correctly      | Combined                   | 32 (23)       | 10 (8)        | 12 (10)       | 13 (10)      |
|                                                       | Exercise only              | 25 (20)       | 11 (10)       | 6 (6)         | 9 (7)        |
| Pain with exercise                                    | Combined                   | 4 (3)         | 5 (4)         | 3 (3)         | 0 (0)        |
|                                                       | Exercise only              | 4 (3)         | 2 (2)         | 0 (0)         | 3 (3)        |
| Trouble remembering to exercise                       | Combined                   | 73 (53)       | 63 (51)       | 52 (46)       | 69 (54)      |
|                                                       | Exercise only              | 58 (46)       | 43 (37)       | 42 (40)       | 57 (48)      |
| Perceived exercises did not help urinary incontinence | Combined                   | 18 (13)       | 14 (11)       | 11 (10)       | 10 (8)       |
|                                                       | Exercise only              | 19 (15)       | 11 (10)       | 12 (12)       | 7 (6)        |
| Improved urinary incontinence, no need to exercise    | Combined                   | 3 (2)         | 10 (8)        | 10 (9)        | 15 (12)      |
|                                                       | Exercise only              | 1 (1)         | 2 (2)         | 3 (3)         | 7 (6)        |
| Continence pessary more important than exercise       | Combined only              | 22 (16)       | 20 (16)       | 20 (18)       | Not included |
| Any reported barrier                                  | Combined                   | 111 (77)      | 96 (79)       | 88 (72)       | 86 (67)      |
|                                                       | Exercise only              | 87 (69)       | 72 (63)       | 64 (62)       | 87 (72)      |
| Other barriers                                        |                            |               |               |               |              |
| Illness self/family                                   | Combined                   | 4 (3)         | 6 (5)         | 6 (6)         | 5 (3)        |
|                                                       | Exercise only              | 3 (2)         | 4 (4)         | 6 (6)         | 9 (7)        |
| Vacation/travel                                       | Combined                   | 1 (1)         | 2 (2)         | 4 (4)         | 0 (0)        |
|                                                       | Exercise only              | 3 (2)         | 4 (4)         | 1 (1)         | 6 (5)        |
| Fatigue                                               | Combined                   | 2 (1)         | 2 (2)         | 2 (2)         | 0 (0)        |
|                                                       | Exercise only              | 1 (1)         | 2 (2)         | 1 (1)         | 1 (1)        |
| Work                                                  | Combined                   | 1 (1)         | 2 (2)         | 1 (1)         | 0 (0)        |
|                                                       | Exercise only              | 1 (1)         | 0 (0)         | 0 (0)         | 0 (0)        |
| Personal conflicts                                    | Combined                   | 3 (2)         | 4 (3)         | 5 (4)         | 3 (2)        |
|                                                       | Exercise only              | 0 (0)         | 2 (2)         | 2 (2)         | 2 (2)        |
| Boredom with exercise                                 | Combined                   | 0 (0)         | 0 (0)         | 0 (0)         | 2 (2)        |
|                                                       | Exercise only              | 1 (1)         | 2 (2)         | 2 (2)         | 2 (2)        |
